# Supplementary material for: The Influence of the 1-(3-Trifluoromethyl-Benzyl)-1H-Pyrazole-4-yl Moiety on the Adenosine Receptors Affinity Profile of Pyrazolo[4,3-e][1,2,4]Triazolo[1,5-c]Pyrimidine Derivatives
Source: PubMed Central journal article supplement (PMC4666649; doi:10.1371/journal.pone.0143504), 2015-12-01

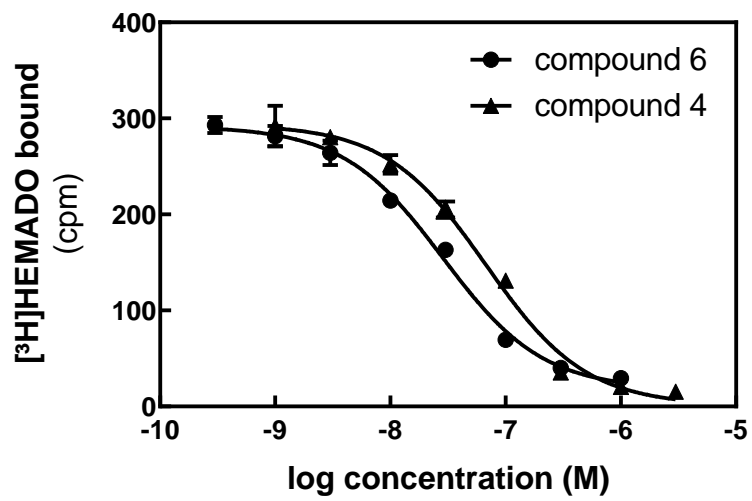

Supplement: pone.0143504.s001.pdf [file pone.0143504.s001.pdf]
